# Supplementary material for: Significant associations between driver gene mutations and DNA methylation alterations across many cancer types
Source: PLoS Comput Biol. 2017 Nov 10;13(11):e1005840. doi: 10.1371/journal.pcbi.1005840 (PMC5709060; doi:10.1371/journal.pcbi.1005840)
Supplement: S1 Table — (XLSX) [file pcbi.1005840.s010.xlsx]

## Sheet: BLCA
Driver genes associated with any of the top 5 PCs across 18 cancer types (q<0.05; Wilcoxon rank sum test)
No driver gene-PC association for BLCA

## Sheet: BRCA
Driver genes associated with any of the top 5 PCs across 18 cancer types (q<0.05; Wilcoxon rank sum test)
	PC1		PC2		PC3		PC4		PC5
Gene	q-value	Direction	q-value	Direction	q-value	Direction	q-value	Direction	q-value	Direction
PIK3CA	0.00554877	1	0.33578	-1	0.981605	1	0.538301	-1	0.00199966	1
TP53	3.78565e-10	-1	0.00554877	1	0.103508	1	0.392657	1	1.30192e-20	-1
CDH1	0.959607	-1	0.0185333	-1	0.0652096	-1	0.294637	-1	0.00180648	1
GATA3	0.00906146	1	0.357053	-1	0.599021	-1	0.500519	1	0.289674	1
MAP2K4	0.0185333	1	0.985855	1	0.552475	1	0.910437	1	0.702744	1
RPGR	0.98902	-1	0.33578	-1	0.880503	-1	0.500519	-1	0.0185333	-1

## Sheet: COAD
Driver genes associated with any of the top 5 PCs across 18 cancer types (q<0.05; Wilcoxon rank sum test)
	PC1		PC2		PC3		PC4		PC5
Gene	q-value	Direction	q-value	Direction	q-value	Direction	q-value	Direction	q-value	Direction
APC	0.0239861	1	0.125389	1	0.679984	-1	0.133414	-1	0.240208	-1
RNF43	0.0418338	-1	0.329173	-1	0.053412	1	0.112483	1	0.701071	1
BMPR2	0.049652	-1	0.428	-1	0.179329	1	0.128183	1	0.49839	1
UBQLN2	0.158099	-1	0.881996	-1	0.0350483	1	0.195787	1	0.975492	-1
MGA	0.053412	-1	0.963957	-1	0.0487231	1	0.305284	1	0.236545	1
BCORL1	0.0487231	-1	0.877838	1	0.901182	1	0.353366	1	0.553157	-1
UBR4	0.0350483	-1	0.922661	1	0.30733	1	0.0418338	1	0.718466	-1
BRAF	0.049652	-1	0.281328	-1	0.063436	1	0.0487231	1	0.97915	1
AKAP9	0.0487231	-1	0.372053	-1	0.147144	1	0.147144	1	0.999607	1
MACF1	0.00724274	-1	0.705172	-1	0.198373	1	0.107755	1	0.340514	1
CCDC88A	0.160798	-1	0.98314	-1	0.0418338	1	0.213548	1	0.135999	1
ARAP3	0.258812	-1	0.271024	-1	0.104912	1	0.0487231	1	0.824446	-1
INADL	0.621176	-1	0.798501	-1	0.200944	1	0.0487231	1	0.744769	-1

## Sheet: GBM
Driver genes associated with any of the top 5 PCs across 18 cancer types (q<0.05; Wilcoxon rank sum test)
	PC1		PC2		PC3		PC4		PC5
Gene	q-value	Direction	q-value	Direction	q-value	Direction	q-value	Direction	q-value	Direction
TP53	0.121469	1	0.697883	1	0.37612	1	0.741499	-1	0.000142932	-1
IDH1	0.293219	-1	0.00135253	1	0.00423058	1	0.0434499	-1	4.36238e-05	-1
SLC26A3	0.0266335	1	0.741499	-1	0.741499	-1	0.814283	1	0.743859	-1
ATRX	0.940228	-1	0.457624	1	0.488274	1	0.237237	-1	0.00423058	-1
EGFR	0.938912	1	0.508411	1	0.712328	1	0.685124	-1	0.00562393	1
PDGFRA	0.00525246	1	0.197	-1	0.772235	-1	0.488274	-1	0.488274	-1

## Sheet: HNSC
Driver genes associated with any of the top 5 PCs across 18 cancer types (q<0.05; Wilcoxon rank sum test)
	PC1		PC2		PC3		PC4		PC5
Gene	q-value	Direction	q-value	Direction	q-value	Direction	q-value	Direction	q-value	Direction
TP53	0.288401	1	0.0512532	-1	0.568958	1	0.119736	1	3.19965e-09	1
NSD1	3.51324e-08	1	0.960462	-1	0.00287767	1	0.267063	1	1.49896e-05	-1
CASP8	0.0512532	-1	0.474615	1	0.211214	1	1.49896e-05	1	0.246827	-1
HRAS	0.426485	-1	0.771285	-1	0.39558	1	0.0224705	1	0.246827	-1
EPHA2	0.972168	1	0.17777	1	0.767727	-1	0.00196708	1	0.767727	-1

## Sheet: KIRC
Driver genes associated with any of the top 5 PCs across 18 cancer types (q<0.05; Wilcoxon rank sum test)
	PC1		PC2		PC3		PC4		PC5
Gene	q-value	Direction	q-value	Direction	q-value	Direction	q-value	Direction	q-value	Direction
SETD2	0.646332	1	0.446239	-1	0.00113829	1	0.0607689	-1	0.124259	1
BAP1	0.779528	-1	0.00113829	-1	0.567217	1	0.0793014	-1	0.924282	1
PBRM1	0.262587	1	0.106462	1	0.000546722	1	0.0315684	-1	0.0253061	1

## Sheet: KIRP
Driver genes associated with any of the top 5 PCs across 18 cancer types (q<0.05; Wilcoxon rank sum test)
	PC1		PC2		PC3		PC4		PC5
Gene	q-value	Direction	q-value	Direction	q-value	Direction	q-value	Direction	q-value	Direction
NEFH	0.74194	-1	0.580813	-1	0.0006661	1	0.815553	1	0.455654	-1
SETD2	0.57138	-1	0.00642731	-1	0.455654	1	0.853778	1	9.06101e-05	1

## Sheet: LIHC
Driver genes associated with any of the top 5 PCs across 18 cancer types (q<0.05; Wilcoxon rank sum test)
	PC1		PC2		PC3		PC4		PC5
Gene	q-value	Direction	q-value	Direction	q-value	Direction	q-value	Direction	q-value	Direction
TP53	0.02132	1	0.35053	1	0.860312	1	0.179658	-1	0.110831	-1
CTNNB1	0.0231514	1	0.35053	-1	0.205835	1	0.40764	1	0.727182	1
AXIN1	0.727182	1	0.0478026	-1	0.573305	-1	0.489761	-1	0.860312	1

## Sheet: LUAD
Driver genes associated with any of the top 5 PCs across 18 cancer types (q<0.05; Wilcoxon rank sum test)
	PC1		PC2		PC3		PC4		PC5
Gene	q-value	Direction	q-value	Direction	q-value	Direction	q-value	Direction	q-value	Direction
TP53	0.53819	-1	0.551069	1	0.0169368	1	1.0974e-09	-1	0.0596742	1
KRAS	0.799218	-1	0.939235	1	0.00521133	-1	0.595591	-1	0.345257	-1
KEAP1	9.96111e-05	-1	0.640618	1	0.596543	-1	0.866366	1	0.407743	1
STK11	0.000298968	-1	0.731874	1	0.0757887	-1	0.466384	1	0.866366	1

## Sheet: LUSC
Driver genes associated with any of the top 5 PCs across 18 cancer types (q<0.05; Wilcoxon rank sum test)
No driver gene-PC association for LUSC

[truncated: 8 more sheets: PAAD, PRAD, READ, SKCM, STAD, TGCT, THCA, UCEC]
