# Supplementary material for: Significant associations between driver gene mutations and DNA methylation alterations across many cancer types
Source: PLoS Comput Biol. 2017 Nov 10;13(11):e1005840. doi: 10.1371/journal.pcbi.1005840 (PMC5709060; doi:10.1371/journal.pcbi.1005840)
Supplement: S4 Table — (XLSX) [file pcbi.1005840.s013.xlsx]

## Sheet: Sheet1
The number of TP53-associated probes in 18 cancer types (q<0.05; corrected for associations between all probes and TP53 within each type; Wilcoxon rank sum test)
Cancer type	# Positively associated probes	# Negatively associated probes	# Total
BLCA	0	0	0
BRCA	53639	87363	141002
COAD	5656	6386	12042
GBM	5333	19085	24418
HNSC	16202	41149	57351
KIRC	0	0	0
KIRP	0	0	0
LIHC	2035	46255	48290
LUAD	29996	41474	71470
LUSC	0	0	0
PAAD	788	2152	2940
PRAD	303	5473	5776
READ	0	0	0
SKCM	1007	10899	11906
STAD	4887	106343	111230
TGCT	0	0	0
THCA	0	0	0
UCEC	27376	39779	67155
