# Supplementary material for: Significant associations between driver gene mutations and DNA methylation alterations across many cancer types
Source: PLoS Comput Biol. 2017 Nov 10;13(11):e1005840. doi: 10.1371/journal.pcbi.1005840 (PMC5709060; doi:10.1371/journal.pcbi.1005840)
Supplement: S5 Table — (XLSX) [file pcbi.1005840.s014.xlsx]

## Sheet: UP_canonical
Canonical pathways and regulatory gene sets enriched with commonly (shared across at least two cancer types) dysregulated (up or down) genes that correspond to DNAm changes associated with TP53-mutated tumors
Pathway	q-value
REACTOME_CELL_CYCLE	3.46097e-15
REACTOME_CELL_CYCLE_MITOTIC	3.46097e-15
KEGG_CELL_CYCLE	2.87087e-09
REACTOME_DNA_REPLICATION	5.32855e-09
REACTOME_MITOTIC_G1_G1_S_PHASES	4.70196e-08
REACTOME_MITOTIC_M_M_G1_PHASES	9.03851e-08
REACTOME_G1_S_TRANSITION	7.79588e-06
REACTOME_CELL_CYCLE_CHECKPOINTS	1.06635e-05
PID_PLK1_PATHWAY	2.67089e-05
REACTOME_DNA_STRAND_ELONGATION	3.41168e-05
REACTOME_G2_M_CHECKPOINTS	0.000216173
REACTOME_UNWINDING_OF_DNA	0.000229271
REACTOME_REGULATION_OF_MITOTIC_CELL_CYCLE	0.000600432
REACTOME_ACTIVATION_OF_THE_PRE_REPLICATIVE_COMPLEX	0.000619316
REACTOME_M_G1_TRANSITION	0.000619316
REACTOME_E2F_MEDIATED_REGULATION_OF_DNA_REPLICATION	0.000803425
REACTOME_INHIBITION_OF_THE_PROTEOLYTIC_ACTIVITY_OF_APC_C_REQUIRED_FOR_THE_ONSET_OF_ANAPHASE_BY_MITOTIC_SPINDLE_CHECKPOINT_COMPONENTS	0.00105626
REACTOME_G1_S_SPECIFIC_TRANSCRIPTION	0.00105626
REACTOME_ACTIVATION_OF_ATR_IN_RESPONSE_TO_REPLICATION_STRESS	0.00106686
KEGG_DNA_REPLICATION	0.00116836
REACTOME_APC_C_CDC20_MEDIATED_DEGRADATION_OF_MITOTIC_PROTEINS	0.0015881
REACTOME_APC_CDC20_MEDIATED_DEGRADATION_OF_NEK2A	0.00172215
REACTOME_G0_AND_EARLY_G1	0.00288415
REACTOME_S_PHASE	0.00288415
PID_E2F_PATHWAY	0.00305775
KEGG_OOCYTE_MEIOSIS	0.00318163
REACTOME_MITOTIC_G2_G2_M_PHASES	0.00380953
PID_MYC_ACTIVPATHWAY	0.00394572
REACTOME_MITOTIC_PROMETAPHASE	0.00573067
REACTOME_SYNTHESIS_OF_DNA	0.00759642
REACTOME_ASSEMBLY_OF_THE_PRE_REPLICATIVE_COMPLEX	0.0115284
REACTOME_CYCLIN_A_B1_ASSOCIATED_EVENTS_DURING_G2_M_TRANSITION	0.0128636
PID_AURORA_B_PATHWAY	0.0170344
BIOCARTA_MCM_PATHWAY	0.0206732
REACTOME_APC_C_CDC20_MEDIATED_DEGRADATION_OF_CYCLIN_B	0.0206732
REACTOME_CHROMOSOME_MAINTENANCE	0.0248423
REACTOME_BASIGIN_INTERACTIONS	0.0459378
REACTOME_TRANSPORT_OF_GLUCOSE_AND_OTHER_SUGARS_BILE_SALTS_AND_ORGANIC_ACIDS_METAL_IONS_AND_AMINE_COMPOUNDS	0.0459378

## Sheet: UP_regulatory
Canonical pathways and regulatory gene sets enriched with commonly (shared across at least two cancer types) dysregulated (up or down) genes that correspond to DNAm changes associated with TP53-mutated tumors
Pathway	q-value
V$E2F_02	5.65737e-06
V$E2F1DP1_01	5.65737e-06
V$E2F1DP2_01	5.65737e-06
V$E2F4DP2_01	5.65737e-06
V$E2F4DP1_01	5.92306e-06
SGCGSSAAA_V$E2F1DP2_01	5.93436e-06
V$E2F1DP1RB_01	1.83305e-05
V$E2F1_Q6	1.83305e-05
V$E2F1_Q3	2.67062e-05
V$E2F1_Q4_01	8.16748e-05
V$E2F_Q6	8.8424e-05
V$E2F_Q3_01	8.8424e-05
V$E2F_Q4	8.8424e-05
V$E2F1_Q6_01	8.8424e-05
V$E2F_Q4_01	0.000481067
V$E2F_Q3	0.00194277
V$E2F_Q6_01	0.0146892
V$E2F_03	0.0172141
CTTTGA_V$LEF1_Q2	0.0177983
CTTTGT_V$LEF1_Q2	0.0378884
ACTGTGA,MIR-27A,MIR-27B	0.0397416

## Sheet: DN_canonical
No significant pathway

## Sheet: DN_regulatory
Canonical pathways and regulatory gene sets enriched with commonly (shared across at least two cancer types) dysregulated (up or down) genes that correspond to DNAm changes associated with TP53-mutated tumors
Pathway	q-value
TTGTTT_V$FOXO4_01	5.99759e-05
TGTTTGY_V$HNF3_Q6	0.0163766
V$HFH4_01	0.0163766
V$STAT5A_01	0.0163766
AACTTT_UNKNOWN	0.0163766
AAAYWAACM_V$HFH4_01	0.0163766
GTACTGT,MIR-101	0.0163766
CTTTGT_V$LEF1_Q2	0.0198991
TGGAAA_V$NFAT_Q4_01	0.0198991
V$IK3_01	0.0198991
CAGGTG_V$E12_Q6	0.0198991
RTAAACA_V$FREAC2_01	0.0215362
V$FOXO4_01	0.0215362
ATAGGAA,MIR-202	0.0215362
V$FOXO1_01	0.0240753
V$FREAC4_01	0.0255795
V$HFH8_01	0.0255795
V$MYOGENIN_Q6	0.0262813
V$PAX2_02	0.0287696
V$STAT5A_04	0.0302933
V$GR_Q6	0.0302933
V$OCT1_02	0.0302933
GTCTTCC,MIR-7	0.0330543
TGACATY_UNKNOWN	0.0405221
TAATTA_V$CHX10_01	0.0405221
